# Supplementary material
Source: PubMed Central journal article supplement (PMC10624155)
Supplement: NIHMS1888790-supplement-Supplemental_Material.pdf [file NIHMS1888790-supplement-Supplemental_Material.pdf]

## Supporting On-Line Material Correlation Matrices

Boys

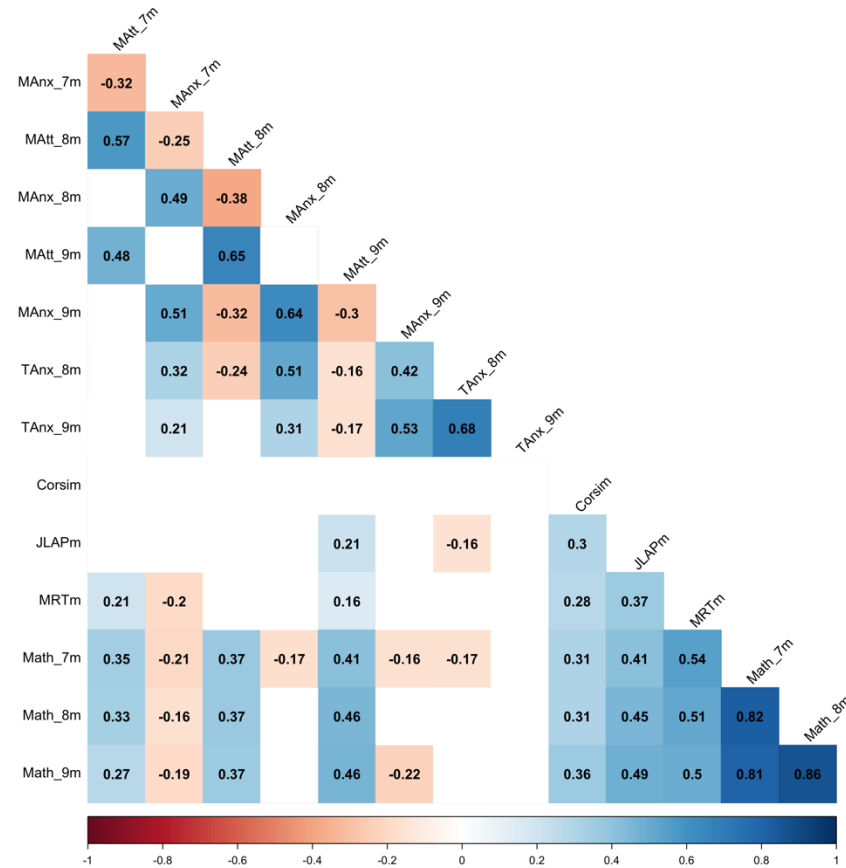

**Figure 1a.** MAtt = Mathematics Attitude, MAnx = Mathematics Anxiety, TAnx = Trait Anxiety, JLAP = Judgment of Line Angle and Position, MRT = Mental Rotation Test. Math = raw Numerical Operations Scores. Blanks cells are insignificant ( $p > .05$ ).

# Girls

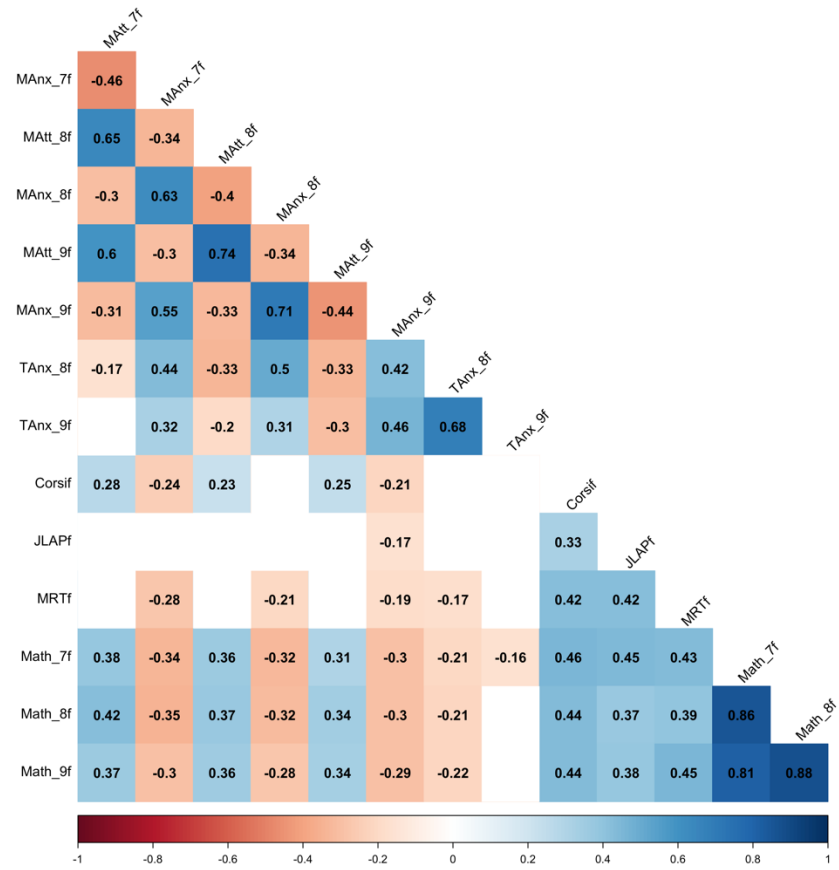

**Figure 2a.** . MAtt = Mathematics Attitude, MAAnx = Mathematics Anxiety, TAnx = Trait Anxiety, JLAP = Judgment of Line Angle and Position, MRT = Mental Rotation Test. Math = raw Numerical Operations Scores. Blanks cells are insignificant ( $p > .05$ ).

## Correlations Between Mathematics Achievement and Mathematics Utility Beliefs and Self-Efficacy

### Boys

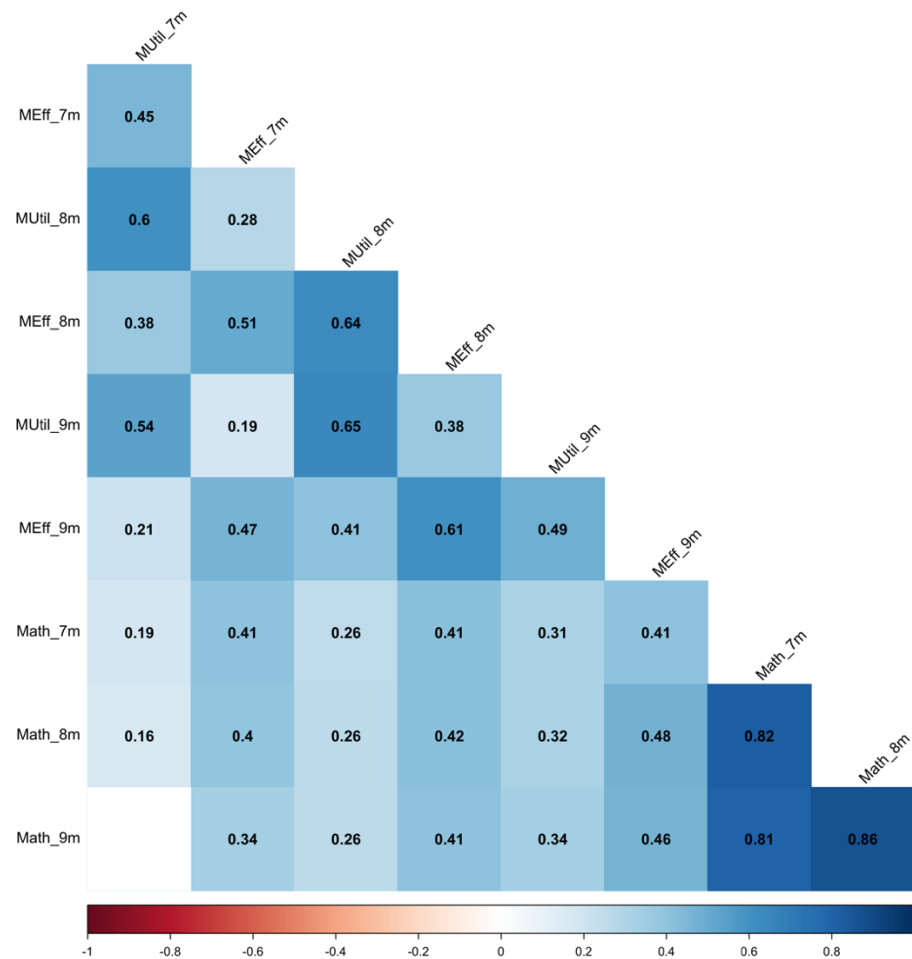

**Figure 3a.** MEff = Mathematics self-efficacy; MUtil = Mathematics utility; m = male. The numerals refer to grade. Blanks cells are insignificant ( $p > .05$ ).

## Girls

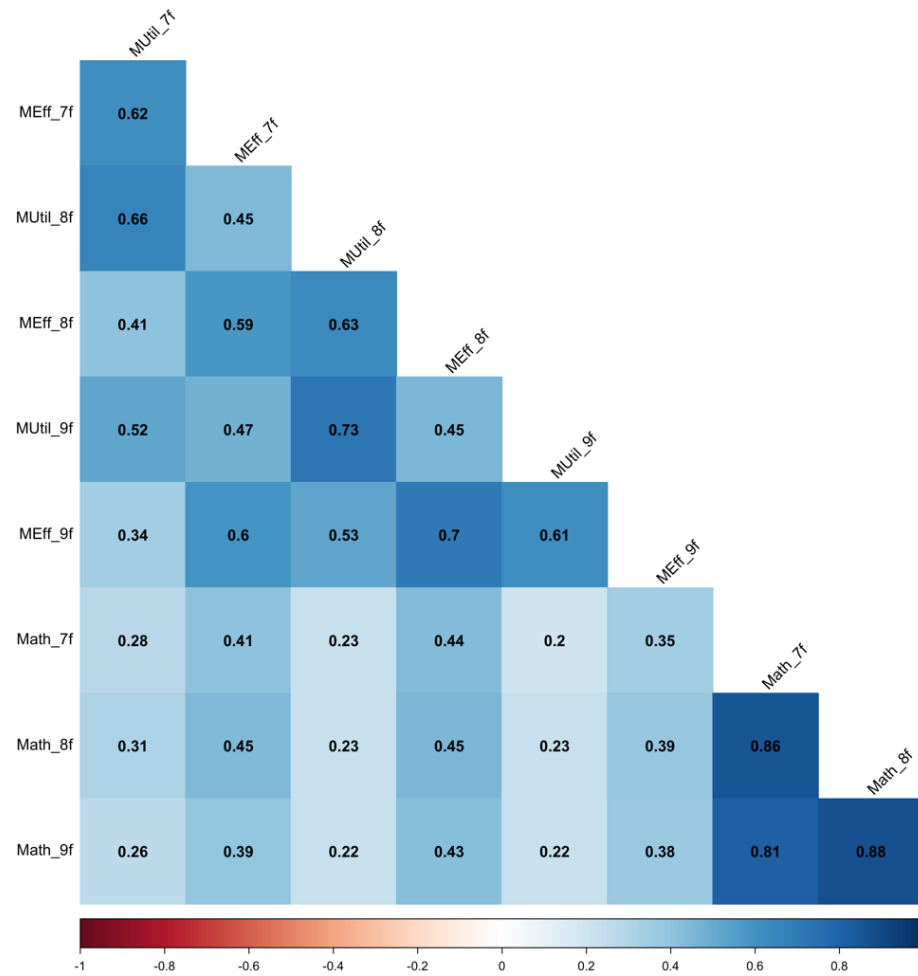

**Figure 4a.** MEff = Mathematics self-efficacy; MUtil = Mathematics utility; f = female. The numerals refer to grade. Blanks cells are insignificant ( $p > .05$ ).

## Mathematics Achievement Predicting Attitudes and Anxiety for Model 5

The core unstandardized and standardized coefficients for model M5, with mathematics achievement predicting attitudes and anxiety, are shown in Table 1a. Across grades, Numerical Operations scores improved, but mathematics attitudes declined, and mathematics anxiety increased ( $ps < .022$ ). In keeping with the univariate results, boys had better spatial competencies, more positive mathematics attitudes, and lower anxiety than did girls. Inconsistent with the univariate results, girls had better initial mathematics achievement scores ( $ps < .018$ ), but this was due to control of spatial abilities; the sex difference for the Mathematics Intercept was no longer significant when the path from Spatial was dropped ( $p = .506$ ). There were no sex differences in developmental change (slopes) in Numerical Operations scores, mathematics attitudes, or mathematics anxiety across grades ( $ps > .317$ ). Indeed, in restricted models examining these trajectories among girls (top section Table 2a) and boys (bottom section Table 2a) separately, the slopes for Numerical Operations, mathematics attitudes, and mathematics anxiety were significant, and all the 90% confidence intervals (CI) for unstandardized estimates overlapped for girls and boys.

For the full sample, cross-grade gains in mathematics achievement were associated with cross-grade improvement in mathematics attitudes ( $p = .004$ ) and showed a trend for cross-grade declines in mathematics anxiety ( $p = .086$ ). As shown in Table 5, these relations were in the same direction for boys and girls, but only significant for boys. The 90% CI did not overlap for estimates for either the mathematics slope to the attitudes slope or the mathematics slope to the anxiety slope, confirming stronger relations for boys than girls.

**Table 1a**

*Latent Growth Curve Model (Model 5) with Achievement Predicting Attitudes and Anxiety for Full Sample*

| Model Component                  | Unstandardized Estimate (SE) | Standardized Estimate (SE) | <i>z</i> | <i>p</i>    |
|----------------------------------|------------------------------|----------------------------|----------|-------------|
| Math Achievement Intercept       | -1.57 (4.20)                 | -0.24 (0.63)               | -0.37    | .709        |
| Math Achievement Slope           | 1.40 (0.18)                  | 0.79 (0.13)                | 7.63     | <b>.000</b> |
| Attitudes Intercept              | 5.03 (0.07)                  | 6.58 (0.43)                | 75.65    | <b>.000</b> |
| Attitudes Slope                  | -0.29 (0.04)                 | -0.86 (0.16)               | -6.97    | <b>.000</b> |
| Anxiety Intercept                | 2.34 (0.05)                  | 3.72 (0.23)                | 43.53    | <b>.000</b> |
| Anxiety Slope                    | 0.07 (0.03)                  | 0.26 (0.12)                | 2.30     | <b>.022</b> |
| Spatial Ability → Math Intercept | 6.13 (0.81)                  | 0.79 (0.05)                | 7.58     | <b>.000</b> |
| Sex → Spatial Ability            | 0.64 (0.12)                  | 0.38 (0.06)                | 5.17     | <b>.000</b> |
| Sex → Math Intercept             | -3.42 (0.76)                 | -0.26 (0.06)               | -4.41    | <b>.001</b> |
| Sex → Math Slope                 | -0.26 (0.26)                 | -0.07 (0.07)               | -1.00    | .317        |
| Sex → Attitudes Intercept        | 0.22 (0.09)                  | 0.15 (0.06)                | 2.37     | <b>.018</b> |
| Sex → Attitudes Slope            | 0.00 (0.05)                  | 0.00 (0.07)                | 0.07     | .944        |
| Sex → Anxiety Intercept          | -0.35 (0.08)                 | -0.28 (0.06)               | -4.60    | <b>.000</b> |
| Sex → Anxiety Slope              | -0.00 (0.04)                 | -0.00 (0.07)               | -0.01    | .995        |
| Math Slope → Attitudes Slope     | 0.05 (0.02)                  | 0.27 (0.09)                | 2.84     | <b>.004</b> |
| Math Slope → Anxiety Slope       | -0.02 (0.01)                 | -0.14 (0.08)               | -1.72    | .086        |

*Note.* Bolded *p* values are significant at an alpha of .05. *z* and *p* values are for unstandardized estimates.

**Table 2a***Latent Growth Curve Model (Model 5) with Achievement Predicting Attitudes and Anxiety by Sex*

| Model Component                  | Unstandardized Estimate (SE) | Standardized Estimate (SE) | <i>z</i> | <i>p</i>    |
|----------------------------------|------------------------------|----------------------------|----------|-------------|
| <b>Girls</b>                     |                              |                            |          |             |
| Math Achievement Intercept       | -3.83 (6.52)                 | -0.57 (0.96)               | -0.59    | .709        |
| Math Achievement Slope           | 1.40 (0.18)                  | 0.84 (0.18)                | 7.94     | <b>.000</b> |
| Attitudes Intercept              | 5.03 (0.07)                  | 6.30 (0.43)                | 71.73    | <b>.000</b> |
| Attitudes Slope                  | -0.26 (0.05)                 | -0.76 (0.17)               | -5.12    | <b>.000</b> |
| Anxiety Intercept                | 2.33 (0.06)                  | 3.80 (0.28)                | 41.29    | <b>.000</b> |
| Anxiety Slope                    | 0.07 (0.04)                  | 0.31 (0.17)                | 1.79     | .074        |
| Spatial Ability → Math Intercept | 4.91 (0.81)                  | 0.73 (0.06)                | 6.07     | <b>.000</b> |
| Math Slope → Attitudes Slope     | 0.03 (0.03)                  | 0.14 (0.13)                | 0.99     | .322        |
| Math Slope → Anxiety Slope       | -0.02 (0.02)                 | -0.16 (0.15)               | -1.04    | .300        |
| <b>Boys</b>                      |                              |                            |          |             |
| Math Achievement Intercept       | -19.54 (9.34)                | -2.83 (1.33)               | -2.09    | <b>.036</b> |
| Math Achievement Slope           | 1.14 (0.19)                  | 0.96 (0.27)                | 5.97     | <b>.000</b> |
| Attitudes Intercept              | 5.25 (0.06)                  | 7.38 (0.57)                | 84.67    | <b>.000</b> |
| Attitudes Slope                  | -0.46 (0.09)                 | -1.33 (0.25)               | -5.04    | <b>.000</b> |
| Anxiety Intercept                | 1.98 (0.05)                  | 4.24 (0.35)                | 41.69    | <b>.000</b> |
| Anxiety Slope                    | 0.14 (0.05)                  | 0.73 (0.26)                | 2.97     | <b>.003</b> |
| Spatial Ability → Math Intercept | 8.22 (1.73)                  | 0.86 (0.06)                | 6.07     | <b>.000</b> |
| Math Slope → Attitudes Slope     | 0.21 (0.07)                  | 0.70 (0.12)                | 2.92     | <b>.004</b> |
| Math Slope → Anxiety Slope       | -0.08 (0.03)                 | -0.50 (0.17)               | -2.36    | <b>.018</b> |

*Note.* Bolded *p* values are significant at an alpha of .05. *z* and *p* values are for unstandardized estimates.

**Table 3a**

*Latent Growth Curve Model (Model 5) with Attitudes and Anxiety Predicting Mathematics for full sample*

| Model Component                  | Unstandardized Estimate (SE) | Standardized Estimate (SE) | <i>z</i> | <i>p</i>    |
|----------------------------------|------------------------------|----------------------------|----------|-------------|
| Math Achievement Intercept       | -1.56 (4.19)                 | -0.23 (0.63)               | -0.37    | .711        |
| Math Achievement Slope           | 1.86 (0.25)                  | 1.04 (0.22)                | 7.35     | <b>.000</b> |
| Attitudes Intercept              | 5.03 (0.07)                  | 6.96 (0.37)                | 76.13    | <b>.000</b> |
| Attitudes Slope                  | -0.22 (0.03)                 | -0.79 (0.15)               | -6.67    | <b>.000</b> |
| Anxiety Intercept                | 2.33 (0.05)                  | 4.17 (0.21)                | 44.75    | <b>.000</b> |
| Anxiety Slope                    | 0.04 (0.03)                  | 0.22 (0.14)                | 1.69     | .091        |
| Spatial Ability → Math Intercept | 6.12 (0.81)                  | 0.79 (0.05)                | 7.59     | <b>.000</b> |
| Sex → Spatial Ability            | 0.64 (0.12)                  | 0.38 (0.06)                | 5.17     | <b>.000</b> |
| Sex → Math Intercept             | -3.42 (0.78)                 | -0.26 (0.06)               | -4.41    | <b>.000</b> |
| Sex → Math Slope                 | -0.24 (0.27)                 | -0.07 (0.07)               | -0.90    | .367        |
| Sex → Attitudes Intercept        | 0.22 (0.09)                  | 0.15 (0.06)                | 2.37     | <b>.018</b> |
| Sex → Attitudes Slope            | -0.01 (0.05)                 | -0.02 (0.08)               | -0.21    | .834        |
| Sex → Anxiety Intercept          | -0.35 (0.07)                 | -0.31 (0.06)               | -4.70    | <b>.000</b> |
| Sex → Anxiety Slope              | 0.01 (0.04)                  | 0.01 (0.09)                | 0.14     | .890        |
| Attitudes Slope → Math Slope     | 1.86 (0.74)                  | 0.29 (0.11)                | 2.53     | <b>.012</b> |
| Anxiety Slope → Math Slope       | -1.01 (1.06)                 | -0.11 (0.11)               | -0.96    | .337        |

*Note.* Bolded *p* values are significant at an alpha of .05. *z* and *p* values are for unstandardized estimates.



**Table 4a**

*Latent Growth Curve Model (Model 5) with Attitudes and Anxiety Predicting Mathematics by Sex*

| Model Component                  | Unstandardized Estimate (SE) | Standardized Estimate (SE) | <i>z</i> | <i>p</i>    |
|----------------------------------|------------------------------|----------------------------|----------|-------------|
| <b>Girls</b>                     |                              |                            |          |             |
| Math Achievement Intercept       | -5.01 (6.57)                 | -0.72 (.94)                | -0.76    | .446        |
| Math Achievement Slope           | 1.52 (.23)                   | 0.79 (.19)                 | 6.73     | <b>.000</b> |
| Attitudes Intercept              | 5.03 (.07)                   | 6.19 (.52)                 | 71.29    | <b>.000</b> |
| Attitudes Slope                  | -0.22 (.03)                  | -0.62 (.14)                | -6.66    | <b>.000</b> |
| Anxiety Intercept                | 2.39 (.06)                   | 3.27 (.27)                 | 39.65    | <b>.000</b> |
| Anxiety Slope                    | 0.40 (.03)                   | 0.12 (.09)                 | 1.45     | .147        |
| Spatial Ability → Math Intercept | 5.05 (.81)                   | 0.73 (.06)                 | 6.21     | <b>.000</b> |
| Attitudes Slope → Math Slope     | 0.52 (.70)                   | 0.10 (.13)                 | 0.74     | .859        |
| Anxiety Slope → Math Slope       | -0.12 (.69)                  | -0.02 (.12)                | -0.18    | .460        |
| <b>Boys</b>                      |                              |                            |          |             |
| Math Achievement Intercept       | -18.96 (9.29)                | -2.80 (1.34)               | -2.04    | <b>.041</b> |
| Math Achievement Slope           | 2.03 (.47)                   | 1.29 (.51)                 | 4.28     | <b>.000</b> |
| Attitudes Intercept              | 5.25 (.06)                   | 7.31 (.62)                 | 84.10    | <b>.000</b> |
| Attitudes Slope                  | -0.23 (.03)                  | -0.69 (.15)                | -6.71    | <b>.000</b> |
| Anxiety Intercept                | 1.98 (.05)                   | 4.00 (.40)                 | 40.37    | <b>.000</b> |
| Anxiety Slope                    | 0.05 (.02)                   | 0.27 (.16)                 | 1.99     | <b>.047</b> |
| Spatial Ability → Math Intercept | 8.15 (1.73)                  | 0.86 (.07)                 | 4.71     | <b>.000</b> |
| Attitudes Slope → Math Slope     | 4.98 (2.54)                  | 1.06 (.60)                 | 1.97     | <b>.049</b> |
| Anxiety Slope → Math Slope       | 5.45 (5.02)                  | 0.60 (.55)                 | 1.09     | .277        |

*Note.* Bolded *p* values are significant at an alpha of .05. *z* and *p* values are for unstandardized estimates.
